# Supplementary material
Source: publisher site journal article supplement (https://www.dovepress.com/article/500723)
Supplement: Supplementary file 1 [file get_supplementary_file.php]

**Increased co-expression of PD-L1 and CTLA-4 predicts poor overall survival in patients with acute myeloid leukemia following allogeneic hematopoietic stem cell transplantation**

**Table S1.** Clinical characteristics of AML patients.

| **Variables** | **Allo-HSCT** | **Chemotherapy** | ***P*-value** |
| --- | --- | --- | --- |
| Number | 37 | 25 |  |
| Age, years, n (%) |  |  | 0.250 |
| < 60 | 31 (83.8) | 17 (68.0) |  |
| ≥ 60 | 6 (16.2) | 8 (32.0) |  |
| Gender, n (%) |  |  | 1.000 |
| Female | 19 (51.4) | 12 (48.0) |  |
| Male | 18 (48.6) | 13 (52.0) |  |
| Risk stratification, n (%) |  |  | < 0.001 |
| Favorable | 0 (0) | 13 (52.0) |  |
| Intermediate | 26 (70.3) | 5 (20.0) |  |
| Poor | 6 (16.2) | 1 (4.0) |  |
| Unknown | 5 (13.5) | 6 (24.0) |  |
| Subtype, n (%) |  |  | < 0.001 |
| APL | 0 (0) | 8 (32.0) |  |
| Non-APL | 37 (100) | 17 (68.0) |  |
| MRD |  |  | NA |
| Positive | 13 (35.1) | - |  |
| Negative | 21 (56.8) | - |  |
| No detection | 3 (8.1) | - |  |

Allo-HSCT: Allogeneic hematopoietic stem cell transplantation; APL: Acute promyelocytic leukemia; MRD: Minimal residual disease.

**Table S2.** The primers for qRT-PCR.

| Target | Sequence 5' - 3' |
| --- | --- |
| PD-1 (F) | CTCAGGGTGACAGAGAGAAG |
| PD-1 (R) | GACACCAACCACCAGGGTTT |
| PD-L1 (F) | TATGGTGGTGCCGACTACAA |
| PD-L1 (R) | TGCTTGTCCAGATGACTTCG |
| PD-L2 (F) | ACAGTGCTATCTGAACCTGTGG |
| PD-L2 (R) | CTGCAGGCCACCGAATTCTT |
| CTLA-4 (F) | GCCCTGCACTCTCCTGTTTTT |
| CTLA-4 (R) | GGTTGCCGCACAGACTTCA |
| LAG-3 (F) | CTAGCCCAGGTGCCCAACGC |
| LAG-3 (R) | GCCTGCGGAGGGTGAATCCC |
| 18SrRNA (F) | CGGCGGCTTTGGTGACTCTAGA |
| 18SrRNA (R) | CCTGCTGCCTTCCTTGGATGTG |


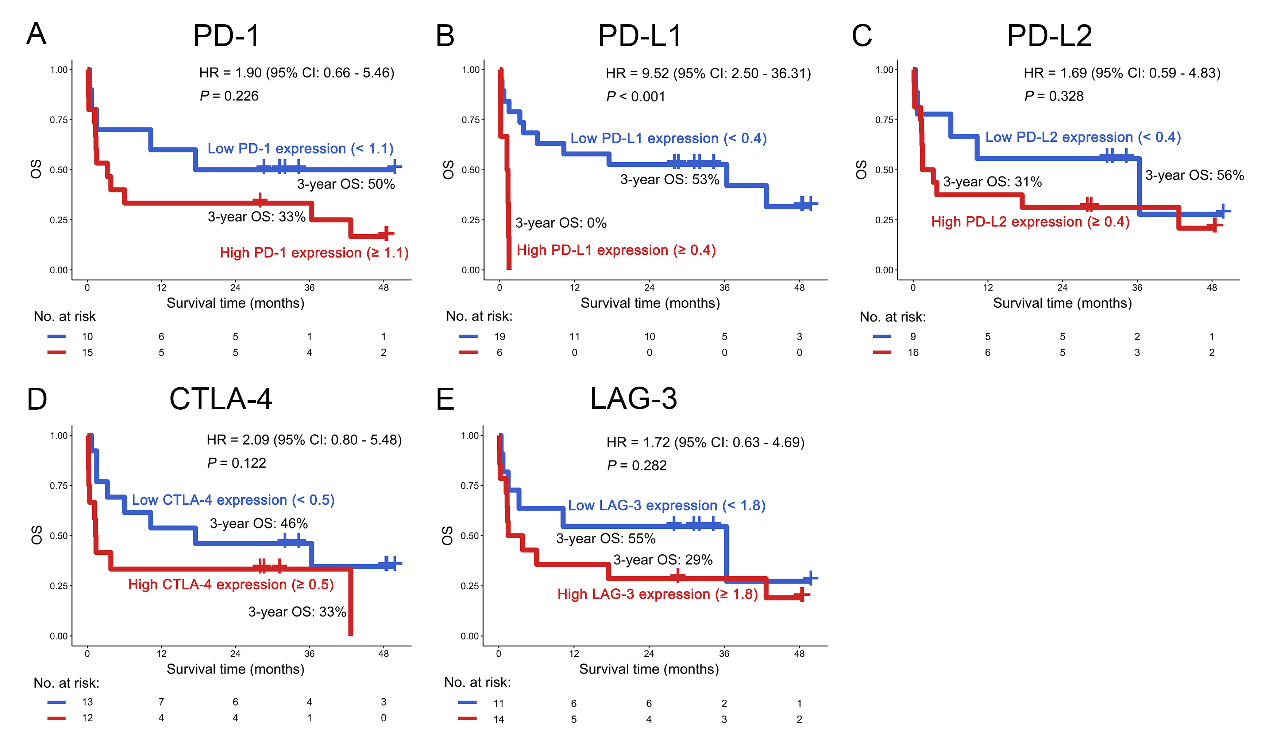


**Figure S1.** OS analysis of ICs in AML patients receiving chemotherapy. A-E: OS differences between AML patients with high and low expression of PD-1 (A), PD-L1 (B), PD-L2 (C), CTLA-4 (D), and LAG-3 (E).


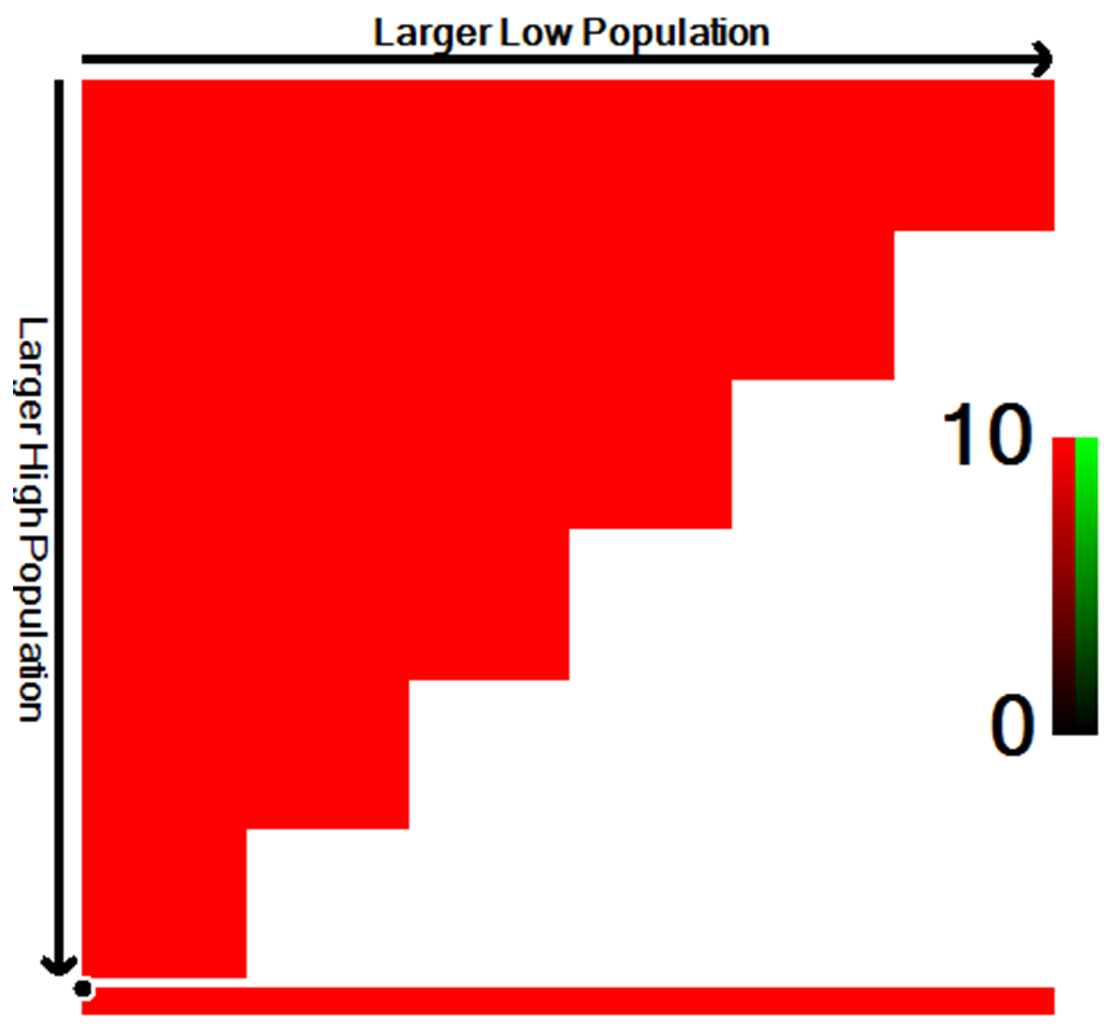


**Figure S2.** The optimal cut-point of risk score was obtained by X-tile software, which was represented by the highest intensity pixel and showed as black dot. The black to red or green in the color scale indicates that the range of pixels was from low to high.
